# Supplementary material for: Programmed dissociation of dimer and trimer origami structures by aptamer–ligand complexes
Source: Royal Society of Chemistry journal article supplement (doi:10.1039/c6nr08209b), 2016-12-19
Supplement: c6nr08209b1.pdf [file c6nr08209b1.pdf]

Supporting Information

**Programmed Dissociation of Dimer and Trimer  
Origami Structures by Aptamer-Ligand Complexes**

*Na Wu and Itamar Willner\**

Institute of Chemistry, The Center of Nanoscience and Nanotechnology,

The Hebrew University of Jerusalem, Jerusalem 91904, Israel

Address correspondence to: [willnea@vms.huji.ac.il](mailto:willnea@vms.huji.ac.il)

Tel: +972-2-6585272

Fax: +972-2-6527715

| Description                    |                            | Origamis Counted |           |
|--------------------------------|----------------------------|------------------|-----------|
| T <sub>1</sub> -T <sub>2</sub> | Prior to cleavage          | Singles          | 30        |
|                                |                            | Dimers           | 248 (89%) |
|                                |                            | In all           | 278       |
|                                | After interaction with ATP | Singles          | 186       |
|                                |                            | Dimers           | 58 (24%)  |
|                                |                            | In all           | 244       |

**Figure S1.** The detailed analysis of large-area domains: the ATP-programmed cleavage of the dimer origami structure T<sub>1</sub>-T<sub>2</sub>.

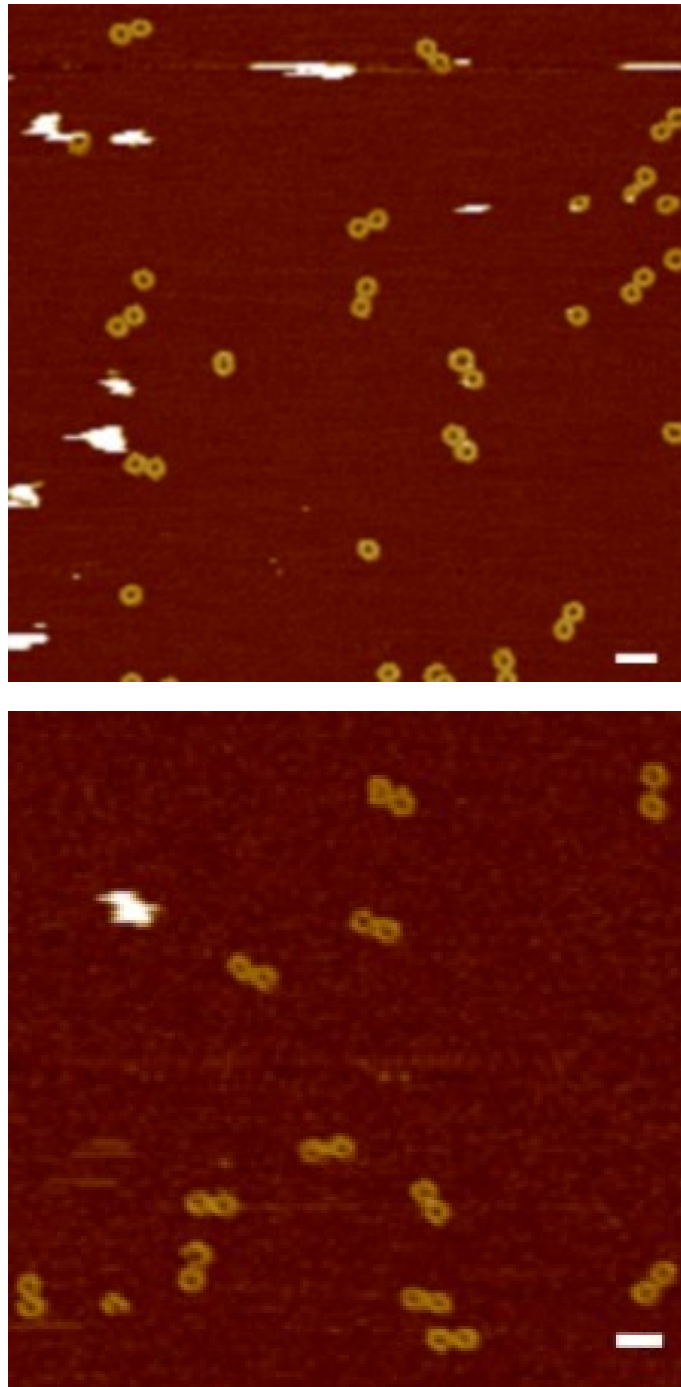

**Figure S2.** AFM images corresponding to the diluted sample depicted in Figure 1 (B). (3 - fold dilution). The images show that no apparent tetramers are observed, as discussed in the text. Scale bars: 200 nm.

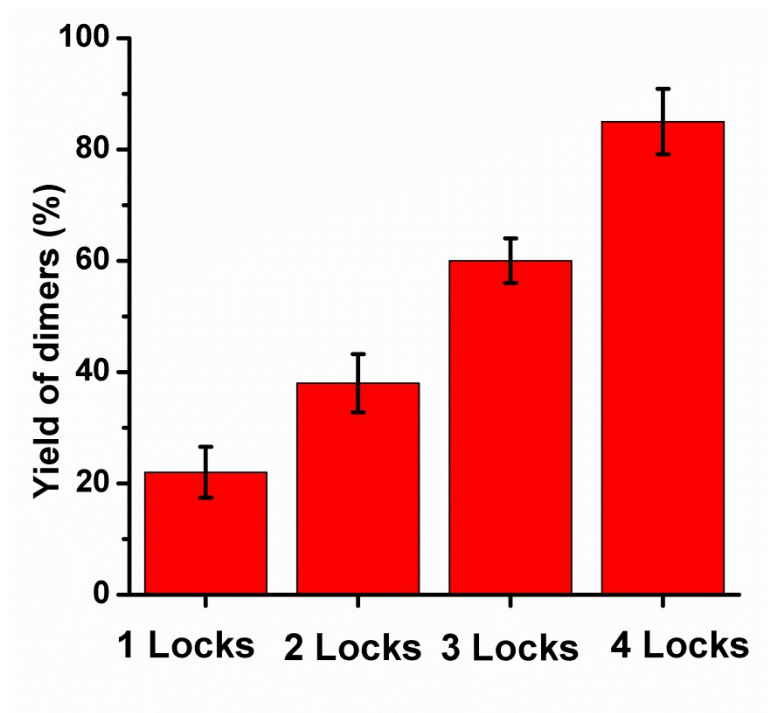

**Figure S3.** The yields of the origami dimers ( $T_1$ - $T_2$ ) as a function of the number of duplex crosslinking units (each duplex includes 11 base-pairs).

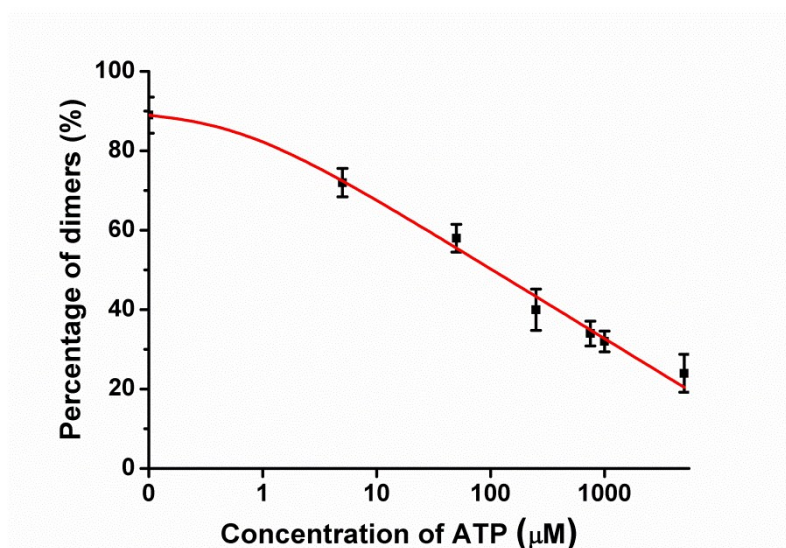

**Figure S4.** Percentage of AFM-imaged  $T_1$ - $T_2$  dimer structures upon subjecting the  $T_1$ - $T_2$  origami mixture to variable concentrations of ATP, for a fixed time-interval of two hours.

| Description                            | The number of Origami tiles / Proportion |         |        |
|----------------------------------------|------------------------------------------|---------|--------|
|                                        | Singles                                  | Dimers  | In all |
| Prior to cleavage                      | 30                                       | 248/89% | 278    |
| After interaction with 5 $\mu$ M ATP   | 92                                       | 242/72% | 334    |
| After interaction with 50 $\mu$ M ATP  | 279                                      | 392/58% | 671    |
| After interaction with 250 $\mu$ M ATP | 200                                      | 134/40% | 334    |
| After interaction with 750 $\mu$ M ATP | 338                                      | 172/34% | 510    |
| After interaction with 1 mM ATP        | 189                                      | 88/32%  | 277    |
| After interaction with 5 mM ATP        | 186                                      | 58/24%  | 244    |

**Table S1.** The detailed analysis of large-area domains: the concentration-dependent (ATP) cleavage of the dimer origami structure  $T_1$ - $T_2$ .

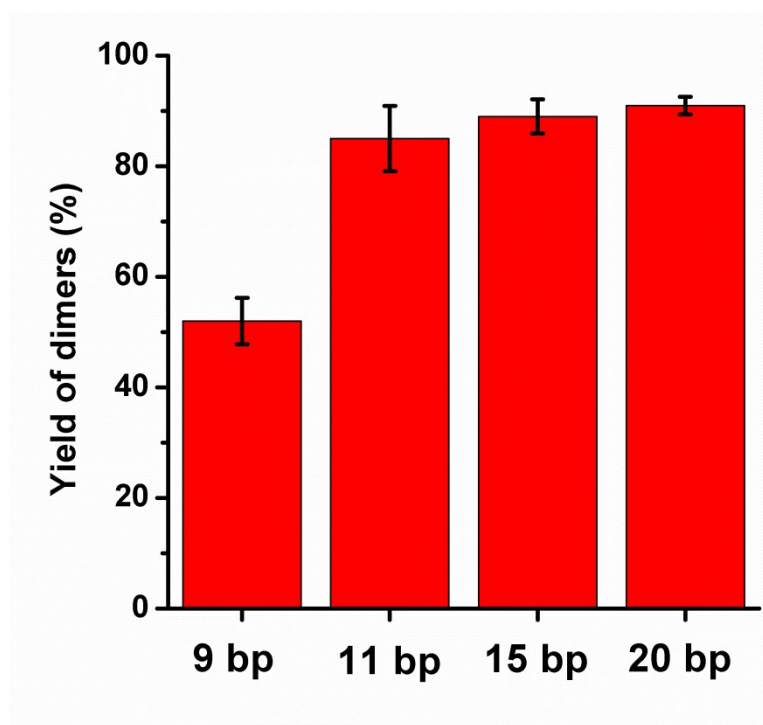

**Figure S5.** The yields of the origami dimers ( $T_1$ - $T_2$ ) as a function of the number of base pairs, upon applying four duplex crosslinking bridges.

| Description                    |                                | Origamis Counted |           |
|--------------------------------|--------------------------------|------------------|-----------|
| T <sub>3</sub> -T <sub>4</sub> | Prior to cleavage              | Singles          | 53        |
|                                |                                | Dimers           | 340 (87%) |
|                                |                                | In all           | 393       |
|                                | After interaction with Cocaine | Singles          | 168       |
|                                |                                | Dimers           | 84 (33%)  |
|                                |                                | In all           | 252       |

**Figure S6.** The detailed analysis of large-area domains: the cocaine-programmed cleavage of the dimer origami structure T<sub>3</sub>-T<sub>4</sub>.

| Description                                | The number of Origami tiles / Proportion |         |        |
|--------------------------------------------|------------------------------------------|---------|--------|
|                                            | Singles                                  | Dimers  | In all |
| Prior to cleavage                          | 53                                       | 340/87% | 393    |
| After interaction with 5 $\mu$ M cocaine   | 117                                      | 238/67% | 355    |
| After interaction with 50 $\mu$ M cocaine  | 91                                       | 134/60% | 225    |
| After interaction with 250 $\mu$ M cocaine | 83                                       | 94/53%  | 177    |
| After interaction with 750 $\mu$ M cocaine | 122                                      | 104/46% | 226    |
| After interaction with 1 mM cocaine        | 122                                      | 92/43%  | 214    |
| After interaction with 5mM cocaine         | 168                                      | 84/33%  | 252    |

**Table S2.** The detailed analysis of large-area domains: the concentration-dependent (cocaine) cleavage of the dimer origami structure T<sub>3</sub>-T<sub>4</sub>.

| Description                          | The number of Origami tiles / Proportion |           |           |         |         |         |        |
|--------------------------------------|------------------------------------------|-----------|-----------|---------|---------|---------|--------|
|                                      | $T_1-T_5-T_4$                            | $T_1-T_5$ | $T_5-T_4$ | $T_1$   | $T_5$   | $T_4$   | In all |
| Prior to cleavage                    | 216/80%                                  | 16/5.9%   | 8/3.0%    | 10/3.7% | 7/2.6%  | 12/4.5% | 269    |
| After interaction with ATP           | 66/19%                                   | 28/7.9%   | 142/40%   | 66/19%  | 28/7.9% | 24/6.8% | 354    |
| After interaction with cocaine       | 60/19%                                   | 120/39%   | 20/6.5%   | 23/7.4% | 22/7.1% | 65/21%  | 310    |
| After interaction with ATP & cocaine | 6/2.8%                                   | 24/11%    | 28/13%    | 44/20%  | 53/25%  | 60/28%  | 215    |

**Figure S7.** The detailed analysis of large-area domains: the ATP or/and cocaine-programmed cleavage of the trimer origami structure  $T_1-T_5-T_4$ .

## Experimental Section

The DNA origami tiles were assembled in a TAE buffer solution consisting of Tris buffer 20 mM that included acetic acid 20 mM, EDTA 1 mM, magnesium acetate, 12.5 mM, pH = 8.0. Single-stranded M13mp18 phage DNA, 5 nM, (New England Biolabs), was dissolved in the buffer solution, and the short staple strands (unmodified staple strands, functionalized specific edge staple strands and biotinylated staple strands) (Integrated DNA Technologies), 50 nM were added to the M13mp18 buffer solution. The mixture was heated to 95 °C in a thermal cycler and then allowed to cool down to 20 °C at a rate of 0.1 °C/10 seconds. The respective origami-tile samples were purified using 100 kD MWCO centrifuge filters to eliminate the excess of unreacted staple strands.

The respective origami monomers were mixed at the same concentration ratio in 1×TAE/Mg<sup>2+</sup> buffer to form the corresponding dimer or trimer structures, after heating the mixture to 45 °C, and allowing it cooling to 15 °C at a rate of 0.1 °C/minute for the assembly of the dimers, and at a rate of 0.05 °C/minute for the assembly of the origami trimers. The trimer origami structure was purified by electrophoresis and

extracting from the gel using Freeze 'N Squeeze spin columns (BioRad). The separated trimer cut out of the gel is depicted in Figure 6, lane 5.

For the cleavage of the origami dimers or trimers in HEPES/Mg<sup>2+</sup> buffer solution that included HEPES 20 mM, MgCl<sub>2</sub> 12.5 mM, pH = 7.0. ATP or/and cocaine was added to the origami TAE/Mg<sup>2+</sup> solution, the volume of the origami solution was five – fold diluted by the added HEPES/Mg<sup>2+</sup> buffer solution. The cleavage was allowed to proceed for 2 hours, at 30 °C. The dissociation yield as a function of ATP/cocaine concentration was probed in HEPES/Mg<sup>2+</sup> buffer solution, for a time-interval of 2 hours, at 30 °C.

The AFM imaging of the different origami samples was performed using a Multi-mode Nanoscope VIII AFM (Bruker) and DNP-S probes (Bruker). Before imaging, streptavidin solution was added into the origami samples, incubating for 5 minutes. Then, a drop, 2 µl, of the respective origami-tiles was deposited on freshly-cleaned mica, and allowed to adsorb for 5 minutes. Imaging was performed by covering the surface with the TAE/Mg<sup>2+</sup> buffer solution.

Electrophoretic experiments were performed using 1% agarose gel, subjected to a constant voltage of 80 V at 0 °C for 1.5 h, in 1×TAE/Mg<sup>2+</sup> buffer. The gel was stained by SYBR gold to identify the separated bands.

## **DNA sequences:**

### **Staple Strands for Hexagonal Origami Structure and Modified Staple Strands**

|     |                                  |
|-----|----------------------------------|
| A01 | ACAGGTCAGAACCAGACCGGAAGCCCGCTTTT |
| A02 | TAGTCAGAATCAGGTCTTTACCCTAACGGGT  |
| A03 | TAGACTGGCAGAGGGGTAATAGTATTTGTAT  |
| A04 | CAGATACATAGGAATACCACATTCGCATAGG  |



A05 TTCAAAGCGGATTAGAGAGTACCTTTAATTGC  
A06 AATCAAAAAGCAAAGCGGATTGCAATTCGAGC  
A07 AGTTTTGCATAGCGTCCAATACTGTGACCATA  
A08 TTGAGATTTAACGCCAAAAGGAATGCAAAAGA  
A09 CATTGTGAATTACCTTATGCGATTTTCATCAG  
A10 ACTTCAAATATCGCGTTTTATCAAAAAG  
A11 ATTAAGAGGTTCCAGAAAACGAGAACGGAATCG  
A12 TCATAAATATAGCGAGAGGCTTTTTACGAGGC  
A13 ATAGTAAGATTACAGGTAGAAAGATTAAGAAC  
A14 ACAACATTAGCAACACTATCATAAGACGATAA  
A15 TGGCTCATTATACCAGTCAGGACGCTAACGGA  
A16 GCGGGATCTGCAGGGAGTTAAAGGAAACTCCA  
A17 AAAATACGTGAGGAAGTTTCCATTGACTATTA  
A18 CATCGCCTACAAAGTACAACGGAGAAAATGTT  
A19 CTGGCTGACGGTGTACAGACCAGGAACTAATG  
A20 TGGGCTTGAGATGGTTTAATTTCACTTTAAT  
A21 CTGAGGCTGTCACCCTCAGCAGCGACTAAAGA  
A22 CTTTTTCATAATGCCACTACGAAGTTATACCA  
A23 AGCGCGAAGATAAATTGTGTGCGAAAAAGAGGA  
A24 CAGATGAACCTTCATCAAGAGTAATAGTAAAT  
A25 CTA AACGTACAGAGGCTTTGAGGAAAGACAGCATCGGAACGAG  
A26 CCTGCTCCCTTTGACCCCCAGCGAGCACCAAC  
A27 AGAACCGGGAAGTACCAACTTTGATCCGCGA  
A28 CCTGACGAGAAACACCAGAACGAGTCTTGACA  
A29 ACACTCATATGTTACTTAGCCGACAATCATA  
A30 AGGGAACCATATTCATTACCCAAAAGGCTTGC  
B01 ATACCGATGAGGTGAATTTCTTAACCAGTAGC  
B02 GCGAATAATAGAAAGGAACAAGTACGCGTGT  
B03 TAGCGTAACATTCCACAGACAGCCCCACCCTC  
B04 CACCCTCATAGTACCGCCACCCTCGCGCAGTC  
B05 TTGCTTTAGTTGCGCCGACAATGACAACAAC  
B06 AGTGAGAATAATTTTTTACGTTGTTATCAGC  
B07 GCCTGTAGCGATCTAAAGTTTTGTTTCAGCGG  
B08 AGGAGGTTGAACCGCCACCCTCAGACTACAAC  
B09 GTATTAAGAGGCTGAGACTCCTCACCGTACTC  
B10 GAGCCTTTAATTGTATCGGTAAAATCTC  
B11 CAAAAAAAACAACCTTTCAACAGTCGTCTTTC  
B12 CAGACGTTTTTCGTCACCAGTACAAAGCCACCA  
B13 CCCTCATTCGGAATAGGTGTATCAAGAGAAGG  
B14 GTATAGCCTTCAGGGATAGCAAGCTACCGTAA  
B15 ATTAGGATTAGCGGGTTTTGCTCTGATATAA  
B16 ACCATTACAGAGCCAGCAAAATCAACAGCTTG  
B17 TCATCGGCTTAGCGTCAGACTGTAAAGGAATT  
B18 AGAGCCACGCCACCCTCAGAACCGCTCATAGT

B19 TCTGAATTAAGCCAGAATGGAAAAGAACCGC  
 B20 TATTCGGAACCTATTATTCTGAAACATGAAA  
 B21 TGGGAATTCATTAGCAAGGCCGGAAGAATCAA  
 B22 GTTTGCCTATTTTCGGTCATAGCCCGCCTCCC  
 B23 TCAGAGCCACCCCTCAGAGCCGCCAAATAAA  
 B24 TCCTCATTTACCGTTCCAGTAAGCCCCCTGCC  
 B25 AGCGTTTGCCTAATCAGTAGCGACAACGTCACCAATGAAACCAT  
 B26 CACCACCAGAGCCACCACCGGAACCCCTTATT  
 B27 TGGCTTTTCCTTGATATTCACAAAACCAGAAC  
 B28 AGTGCCCGTATAAACAGTTAATGCGTCATACA  
 B29 CGGAACCAGAGCCGCCGCCAGCATCAGGTCAG  
 B30 ACGATTGGGATGATACAGGAGTGTGAGTAAC  
 C01 AGGTAATACATTCAACCGATTGACAACAGTA  
 C02 GAAACGCAACATAAAGGTGGCAACAGTAATTC  
 C03 CCAGAAGGTAAGCAGATAGCCGAAACCAATCA  
 C04 AGGGTAATACTGAACACCCTGAACAAGGCTTA  
 C05 AAAGGGCGATTGACGGAATTATTCATTAAG  
 C06 AAATACATAAGACACCACGGAATACAAAGACA  
 C07 AAGAAAAGAAACCGAGGAAACGCAAACGTAGA  
 C08 GAGAATTATGAGCGCTAATATCAGCCCTTTT  
 C09 TTACAAAATAAACAGCCATATTATTTAGACGG  
 C10 TTCATATGGTTTACCAGCGCAGTTTATT  
 C11 TTGTCACAACGCAGTATGTTAGCAATAATAAC  
 C12 GGAATACCAGCTATCTTACCGAAGAGAGATAA  
 C13 CCCACAAGAAAACAGGGAAGCGCATTATCCCA  
 C14 ATAACATAAATTGAGTTAAGCCCAACAATGAA  
 C15 ATCCAAATAAGAAACGATTTTTTGCAGAGAGA  
 C16 GGGCTTAAGTATAAAGCCAACGCTGGGAGGGA  
 C17 TGTCCAGATACCGACAAAAGGTAATATAAAA  
 C18 ATAATCGGTTACGAGCATGTAGAACAAAGTTA  
 C19 TCCGGTATAGCAAATCAGATATAGAAAGTCAG  
 C20 AACGAGCGTCTTTCCAGAGCCTAATTTGCCAG  
 C21 TCTTACCATTGAGAATCGCCATATATAAGAGA  
 C22 ATATAAAGCGACGACAATAAACAAAATATCCC  
 C23 ATCCTAATCTGTCTTTCCCTTATCAACCGCGCC  
 C24 CAATAGCATCTAAGAACGCGAGGCCCAACGCT  
 C25 GCTAATGCCATTTTCGAGCCAGTATAACAACGCCAACATGTAA  
 C26 ACGGGTATCCTGAACAAGAAAAATCATGTTCA  
 C27 GAACCTCCCATCGTAGGAATCATTTTCCAAGA  
 C28 GCTACAATTTTATCCTGAATCTTAGTTTTAGC  
 C29 AGATAAGTTAAACCAAGTACCGCAAAGCCGTT  
 C30 TTTATTTTCGACTTGCGGGAGGTTTGCACCCA  
 D01 GAATAAACTGTGATAAATAAGGCGCCACCAGC  
 D02 AAGACAAAAAATGCTGATGCAAATCCTCAAAT

D03 AGATTAAGTCCTTGAAAACATAGCAATACATT  
D04 TTACATTTCAAACATCAAGAAAACCTATCATC  
D05 ACCGACCGACCGGAATCATAATTACTAGAAAA  
D06 CTATATGTGAACGCGAGAAAACTTTTGAAAT  
D07 CCTTAGAAACGCTGAGAAGAGTCATTATATAA  
D08 TGATGAAAAACAATTTCAATTTGAATAATTTTC  
D09 GAATATACAGTAACAGTACCTTTTAAAGAAGA  
D10 TTCTGACCTAAATTTAATGGTTTCAAAT  
D11 ATATTTTATCCGGCTTAGGTTGGGATAGTGAA  
D12 TTTATCAAAATCGTCGCTATTAATTTACCTTT  
D13 TTTAATGGTTCAATTACCTGAGCAACATCGGG  
D14 TTATTCATAAACAGTACATAAATCTAACCTTG  
D15 AGAAACAATAACGGATTTCGCCTGAGAGGCGAA  
D16 AGAAGATAAAAAATACCGAACGAATTAATAA  
D17 ATCAAACCGCATCACCTTGCTGAACCAATCGC  
D18 TGAGGATTAGAGCCGTC AATAGATGATAGCTT  
D19 ATATTCCTACCAGAAGGAGCGGAAAAAATTAA  
D20 AATTGCGTAGATTTTCAGGTTTAACGTCAGAT  
D21 TCGCCATTAACAGAGGTGAGGCGAAATGAAA  
D22 AATCTAAACTCAATCAATATCTGGTAACAACT  
D23 AATAGATTTAGAAGTATTAGACTTGCGGAACA  
D24 AAGAAACCGATTATCAGATGATGGAATAAAGA  
D25 CAAATCAAGCTGAGAGCCAGCAGCGTCAGTATTAACACCGCCTG  
D26 ATTCGACAATATCTTTAGGAGCACTCAGTTGG  
D27 CAATATAAGTAACATTATCATTTTTACAAACA  
D28 AAAATTATTTGCACGTAAAACAGACAATTCAT  
D29 TATCTAAAACCTGATTTAAATCCTAATTTTAA  
D30 AAGTTTGATCCTGATTGTTTGGATACCATATC  
E01 TCATGGAACAGCCATTGCAACAGGATGCCTGC  
E02 CTTCTTTGCGCAAATTAACCGTTGACGAGCCG  
E03 ACAGGAGGCGTTAGAATCAGAGCGGCCAACGC  
E04 TAGGGCGCGAAGAAAGCGAAAGGAAGGCGAAA  
E05 ATTACCGCACAATATTTTGAATGGCTATTAG  
E06 GTCCATCAATTAGTAATAACATCAAGAACAAT  
E07 GCTTTCCTCCGATTAAAGGGATTAAAGAGTCT  
E08 AAGGAAGGTGGCAAGTGTAGCGTTATAACGT  
E09 GCCCACTACGTGAACCATCACCCATGGCGAGA  
E10 CGGCCTTGCTGGTAATATCCCTTGCCCTG  
E11 AGTAGAAGTGAGGCCACCGAGTAATAGACAGG  
E12 AACGGTACTGCTTTGACGAGCACGCACGCTGC  
E13 GCGTAACCGGAAAGCCGGCGAACGAATCAAGT  
E14 CTTGACGGACCACACCCGCCGCGGGCGCGT  
E15 TTTTTGGGGTCGAGGTGCCGTAAAATTTAGAG  
E16 AGGTCGACCCAGTGCCAAGCTTGCAAAAACGC

E17 GAAGCATAACAATTCCACACAACATTAGCAATA  
 E18 GCGGGGAGCTGCATTAATGAATCGGGAGCTAA  
 E19 ATCCTGTTGCTGGTTTGCCCCAGCGGGGCGC  
 E20 CAAAGGGCGAAAAACCGTCTATCAGGGCGATG  
 E21 AACGACGGTCTAGAGGATCCCCGGAATTGTTA  
 E22 TCCGCTCAAAGTGTAAGCCTGGGAAACCTGT  
 E23 CGTGCCAGAGGCGGTTTGCGTATTGCAGCAAG  
 E24 CGGTCCACTGATGGTGGTTCCGAATCCAACGT  
 E25 TGAGTGAGGCTGTTTCCTGTGTGAGTACCGAGCTCGAATTCGTA  
 E26 GGGTGGTTCGGCTTTCCAGTCGGGGTGCCTAA  
 E27 AATCCCTTTGGCCCTGAGAGAGTTGGGCGCCA  
 E28 AGTCCACTATTAAGAACGTGGACATCGGCAA  
 E29 CTCACTGCTTTCTTTTACCAGTGATTGCCCT  
 E30 TCACCGCCATAAATCAAAGAATAGGAACAAG  
 F01 GGGGATGTCGCTATTACGCCAGCTATGCTGTA  
 F02 ACCGCTTCTCGCACTCCAGCCAGCTTAGATAC  
 F03 GCGGATTGTCGGATTCTCCGTGGGCAAAGAAT  
 F04 TTAAATTTGTTAATATTTTGTAAATTTAAATG  
 F05 GGCCTCTTGCTGCAAGGCGATTAAGTTGGGTA  
 F06 CAGGAAGATGGTGCCGAAACCAGTCGGTGCG  
 F07 ACAACCCGACCGTAATGGGATAGGATCGGCCT  
 F08 TTGTAAACTTGTTAAATCAGCTCAAGCGAGTA  
 F09 TGAGAGTCTGGAGCAAACAAGAGATATTTAAA  
 F10 GCAACTGTTGGGAAGGGCGAGCAAAGCG  
 F11 CCATTGCGAGGGGACGACGACAGTTACGTTG  
 F12 GTGTAGATATCAACATTAATGTGTTTTTAA  
 F13 CCAATAGGAGATTGTATAAGCAAATCGATGA  
 F14 AAACAGGAAACGCCATCAAAAATACCTGTAGC  
 F15 ACGGTAATCGTAAACTAGCATGTAGCCCCAA  
 F16 GCTCAACATTAATTGCTGAATATAGGCGAAAG  
 F17 ATTTGCAAGATTTAGTTTGACCATTTCCGGC  
 F18 TAGCAAAAATCATACAGGCAAGGAACAAACG  
 F19 CAATGCCTTAGAACCCTCATATATAATTCGCA  
 F20 GAGAGATCTACAAAGGCTATCAGGTCATTGCC  
 F21 CTTAGAGCTGTTTTAAATATGCAAATTCTGC  
 F22 GAACGAGTAATGGTCAATAACCTGGCATTAAAC  
 F23 ATCCAATATTAAGCAATAAAGCCTCAAGGATA  
 F24 AAAATTTGAGTAATGTGTAGGTACTATTTTT  
 F25 TATTTTCAATAACAGTTGATTCCCCTAAAGTACGGTGTCTGGAA  
 F26 AAAGCTAATCTACTAATAGTAGTATTTAGCTA  
 F27 AAAGGGTGAGCCTTTATTTCAACGCAGAGCAT  
 F28 ATAAATTAATGCCGGAGAGGGTAGAAGATTCA  
 F29 GCATCAATATCGGTTGTACCAAAAATACTTTT  
 F30 GCGGGAGAAGAAAGGCCGGAGACATCTAGCTG

linker AB1 CATCGCCCACGCATAACCGATATATTCGGTTCG  
linker AB2 GGGATTTTGCTAAGGCTCCAGCAACGGCAAAGAGGCAAAA  
linker AB3 CACTGAGTAGTAAATGAATTTTCTACACTAAA  
linker AB4 CATGCCAATAGGCAGACGGTACGA  
linker AB5 CGTCGAGAGGGTAGTACCAGGCGGATAAGCTCATTGAGTGAATATCAACGTAACAA  
linker BC1 GTGAATTATCACCGTCACCGACTTGAGCCATT  
linker BC2 AGACTCCTTATTATCAATAGAGCAGCACCCATCTTTTCAT  
linker BC3 ATAGCAATCAAAAAGAACTGGCATGAAAATCAC  
linker BC4 AGAAATAATAAGGGTTGAGGTGAC  
linker BC5 TAGCAGCCTTTATTTAACGTCAAAAATGAACGGGGTCAGTGCCTACTGGTAATAAG  
linker CD1 AGCCTGTTTAGTATCATATGCGTTATACAAAT  
linker CD2 ACCTTTTTAACCGTTAATTTGGCAGAGGAGAACGCGCCTG  
linker CD3 CTTCTGTAAATCATAGGTCTGAGATCAACAAT  
linker CD4 TGAAAATATATGGAACAAGCCTCA  
linker CD5 CAAAATCGCGCATTGCTTTGAATACCAAAGATTAGTTGCTATTTTTGAAGCCTTAA  
linker DE1 TCTTTAATGCGCGAACTGATAGCCCTAAAACA  
linker DE2 TTTTATAATCAGAACTCAAAGTGCCACCAGTTGAAAGGA  
linker DE3 ACTATGGTGCCAGAATCCTGAGAAAAGGAAGGT  
linker DE4 TACATTAATGCGACGTTATTTTGC  
linker DE5 AGGGAGCCCCCGCACTAAATCGGAACCGGAAGGGTTAGAACCTTATACTTCTGAA  
linker EF1 ACGCCAGGGTTTTCCAGTCACGACGTTGTAA  
linker EF2 TCTGCCAGTTTGCATTCAGGTGGTCATACTAACTCACATT  
linker EF3 CAGCTTTCGGGCGCATCGTAACCGGCGTTGCG  
linker EF4 CCTTATTCGCGTAACAGCTGAGAC  
linker EF5 GATAATCAGAAACAATCATATGTACCCAGTGTTGTTCCAGTTTGCCCGAGATAGG  
linker FA1 TCCTTTTGATAAGAGGTCAATTTTTCGGATGG  
linker FA2 ATGCTTTAAACAGAAGCCCGCATTCCATTTTGGGGCGCGA  
linker FA3 AAACCAAAATTCATTGAATCCCCCAAAGGTG  
linker FA4 AGACCCCTCGTTACCCTGTAACAT  
linker FA5 TAATAAAACGAATTGGGAAGAAAATCTTATGATATTCAACCGTGCAAATCACCA  
loop 1 CTGACCTGAAAGCGTAAGAATACGTGGCACAG  
loop 2 GTAATAAAAGGGACATTCTGGCCAACAGAGAT  
loop 3 TTACATTGGCAGATTCACCAGTCACACGACCA  
loop 4 ATACCTACATTTTGACGCTCAATCGTCTGAAA  
L<sub>1</sub>D09 TTGTCCACCTGGGGGAGTATTGCGGAGGAAGGTGTTTTTGAATATACAGTAACAGTACCTTTTAAAGAA  
GA  
L<sub>1</sub>D15 TTGTCCACCTGGGGGAGTATTGCGGAGGAAGGTGTTTTTAGAAACAATAACGGATTGCGCTGAGAGGC  
GAA  
L<sub>1</sub>D20 TTGTCCACCTGGGGGAGTATTGCGGAGGAAGGTGTTTTAATTGCGTAGATTTTCAGGTTAACGTCAG  
AT  
L<sub>1</sub>D28 TTGTCCACCTGGGGGAGTATTGCGGAGGAAGGTGTTTTTAAAATTATTTGCACGTAAAACAGACAATTCA  
T  
L<sub>1</sub>'A09 CAGGTGGACAATTTTTTATTGTGAATTACCTTATGCGATTTTCATCAG  
L<sub>1</sub>'A15 CAGGTGGACAATTTTTTGGCTCATTATACCAGTCAGGACGCTAACGGA

|                           |                                                                                       |
|---------------------------|---------------------------------------------------------------------------------------|
| L <sub>1</sub> 'A20       | CAGGTGGACAATTTTTGGGCTTGAGATGGTTAATTTCAACTTTAAT                                        |
| L <sub>1</sub> 'A28       | CAGGTGGACAATTTTTCTGACGAGAAACACCAGAACGAGTCTTGACA                                       |
| L <sub>2</sub> D09        | ATCTCGGGAGACAAGGATAAATCCTTCAATGAAGTGGGTCTCCCTTTTTGAATATACAGTAACAGTACCT<br>TTTAAAGAAGA |
| L <sub>2</sub> D15        | ATCTCGGGAGACAAGGATAAATCCTTCAATGAAGTGGGTCTCCCTTTTTAGAAACAATAACGGATTGCG<br>CTGAGAGGCGAA |
| L <sub>2</sub> D20        | ATCTCGGGAGACAAGGATAAATCCTTCAATGAAGTGGGTCTCCCTTTTTAATTGCGTAGATTTTCAGGTT<br>TAACGTCAGAT |
| L <sub>2</sub> D28        | ATCTCGGGAGACAAGGATAAATCCTTCAATGAAGTGGGTCTCCCTTTTTAAAATTATTTGCACGTAAAAC<br>AGACAATTCAT |
| L <sub>2</sub> 'A09       | GTCTCCCGAGATTTTTTTCATTGTGAATTACCTTATGCGATTTTCATCAG                                    |
| L <sub>2</sub> 'A15       | GTCTCCCGAGATTTTTTGGCTCATTATACCAGTCAGGACGCTAACGGA                                      |
| L <sub>2</sub> 'A20       | GTCTCCCGAGATTTTTTGGGCTTGAGATGGTTAATTTCAACTTTAAT                                       |
| L <sub>2</sub> 'A28       | GTCTCCCGAGATTTTTTCTGACGAGAAACACCAGAACGAGTCTTGACA                                      |
| B03-Biotin                | Biotin-TTTTTAGCGTAACATTCCACAGACAGCCCCACCCTC                                           |
| C03-Biotin                | Biotin-TTTTTCCAGAAGGTAAGCAGATAGCCGAAACCAATCA                                          |
|                           |                                                                                       |
| L <sub>1</sub> 'A09-15bp  | CCCCCAGGTGGACAATTTTTTCATTGTGAATTACCTTATGCGATTTTCATCAG                                 |
| L <sub>1</sub> 'A15-15bp  | CCCCCAGGTGGACAATTTTTGGCTCATTATACCAGTCAGGACGCTAACGGA                                   |
| L <sub>1</sub> 'A20-15bp  | CCCCCAGGTGGACAATTTTTGGGCTTGAGATGGTTAATTTCAACTTTAAT                                    |
| L <sub>1</sub> 'A28-15bp  | CCCCCAGGTGGACAATTTTTCTGACGAGAAACACCAGAACGAGTCTTGACA                                   |
| L <sub>1</sub> 'A09-20bp  | ATACTCCCCCAGGTGGACAATTTTTTCATTGTGAATTACCTTATGCGATTTTCATCAG                            |
| L <sub>1</sub> 'A15-20bp  | ATACTCCCCCAGGTGGACAATTTTTGGCTCATTATACCAGTCAGGACGCTAACGGA                              |
| L <sub>1</sub> 'A20-20bp  | ATACTCCCCCAGGTGGACAATTTTTGGGCTTGAGATGGTTAATTTCAACTTTAAT                               |
| L <sub>1</sub> 'A28-20bp  | ATACTCCCCCAGGTGGACAATTTTTCTGACGAGAAACACCAGAACGAGTCTTGACA                              |
| L <sub>1</sub> 'A09-9bp   | GGTGGACAATTTTTTCATTGTGAATTACCTTATGCGATTTTCATCAG                                       |
| L <sub>1</sub> 'A15-9bp   | GGTGGACAATTTTTGGCTCATTATACCAGTCAGGACGCTAACGGA                                         |
| L <sub>1</sub> 'A20-9bp   | GGTGGACAATTTTTGGGCTTGAGATGGTTAATTTCAACTTTAAT                                          |
| L <sub>1</sub> 'A28-9bp   | GGTGGACAATTTTTCTGACGAGAAACACCAGAACGAGTCTTGACA                                         |
|                           |                                                                                       |
| L <sub>1</sub> 'A-8lock-1 | CAGGTGGACAATTTTTATGCGATTTTCATCAG                                                      |
| L <sub>1</sub> 'A-8lock-2 | CAGGTGGACAATTTTTTCAGGACGCTAACGGA                                                      |
| L <sub>1</sub> 'A-8lock-3 | CAGGTGGACAATTTTTAATTTCAACTTTAAT                                                       |
| L <sub>1</sub> 'A-8lock-4 | CAGGTGGACAATTTTTAGAACGAGTCTTGACA                                                      |
| L <sub>1</sub> 'A-8lock-5 | CAGGTGGACAATTTTTTCATTGTGAATTACCTT                                                     |
| L <sub>1</sub> 'A-8lock-6 | CAGGTGGACAATTTTTGGCTCATTATACCAG                                                       |
| L <sub>1</sub> 'A-8lock-7 | CAGGTGGACAATTTTTGGGCTTGAGATGGTT                                                       |
| L <sub>1</sub> 'A-8lock-8 | CAGGTGGACAATTTTTCTGACGAGAAACACC                                                       |
| L <sub>1</sub> D-8lock-1  | TTGTCCACCTGGGGGAGTATTGCGGAGGAAGGTGTTTTTACCTTTTAAAGAAGA                                |
| L <sub>1</sub> D-8lock-2  | TTGTCCACCTGGGGGAGTATTGCGGAGGAAGGTGTTTTTCGCTGAGAGGCGAA                                 |

|                          |                                                        |
|--------------------------|--------------------------------------------------------|
| L <sub>1</sub> D-8lock-3 | TTGTCCACCTGGGGGAGTATTGCGGAGGAAGGTGTTTTTAGGTTAACGTCAGAT |
| L <sub>1</sub> D-8lock-4 | TTGTCCACCTGGGGGAGTATTGCGGAGGAAGGTGTTTTAAAACAGACAATTCAT |
| L <sub>1</sub> D-8lock-5 | TTGTCCACCTGGGGGAGTATTGCGGAGGAAGGTGTTTTGAATATACAGTAACAG |
| L <sub>1</sub> D-8lock-6 | TTGTCCACCTGGGGGAGTATTGCGGAGGAAGGTGTTTTAGAAACAATAACGGAT |
| L <sub>1</sub> D-8lock-7 | TTGTCCACCTGGGGGAGTATTGCGGAGGAAGGTGTTTTAATTGCGTAGATTTTC |
| L <sub>1</sub> D-8lock-8 | TTGTCCACCTGGGGGAGTATTGCGGAGGAAGGTGTTTTAAAATTATTTGCACGT |
